# Supplementary material for: Impact of High Temperature on Germination, Seedling Growth and Enzymatic Activity of Wheat
Source: MDPI journal article supplement (doi:10.3390/agriculture12091500), 2022-09-19
Supplement: s1 [file s1]

**SUPPLEMENTARY INFORMATION**

**Table S1. Effect of different temperature regimes on germination parameters of Indian wheat genotypes**

| Parameter→                        | Standard germination (%) |                      |                      |                      |                         | Speed of germination |                      |                      |                      |                         |
|-----------------------------------|--------------------------|----------------------|----------------------|----------------------|-------------------------|----------------------|----------------------|----------------------|----------------------|-------------------------|
| Temperature (T)→<br>Genotype (G)↓ | 20°C<br>(Mean ± SE)      | 25°C<br>(Mean ± SE)  | 30°C<br>(Mean ± SE)  | 35°C<br>(Mean ± SE)  | Mean (G)<br>(Mean ± SE) | 20°C<br>(Mean ± SE)  | 25°C<br>(Mean ± SE)  | 30°C<br>(Mean ± SE)  | 35°C<br>(Mean ± SE)  | Mean (G)<br>(Mean ± SE) |
| WH 730                            | 97.3 ± 1.20 a            | 97.5 ± 0.76 a        | 93.7 ± 2.60 a        | 93.0 ± 1.53 a        | <b>95.4 ± 0.94 A</b>    | 16.0 ± 0.45 cde      | 14.7 ± 0.39 d        | 14.1 ± 0.03 def      | 12.6 ± 0.36 de       | <b>14.3 ± 0.48 GH</b>   |
| WH 1123                           | 98.5 ± 0.29 a            | 97.8 ± 0.93 a        | 94.3 ± 2.03 a        | 92.3 ± 2.03 ab       | <b>95.8 ± 1.00 A</b>    | 16.6 ± 0.04 cd       | 15.7 ± 0.51 d        | 12.2 ± 0.17 g        | 10.7 ± 0.36 f        | <b>13.8 ± 0.92 H</b>    |
| WH 1021                           | 98.5 ± 0.29 a            | 96.7 ± 0.33 a        | 88.0 ± 2.08 ab       | 81.3 ± 1.76 cde      | <b>91.1 ± 2.16 BC</b>   | 16.0 ± 0.05 cde      | 17.6 ± 0.03 c        | 14.5 ± 0.19 cde      | 12.5 ± 0.33 e        | <b>15.1 ± 0.72 F</b>    |
| IC 443661                         | 97.5 ± 0.76 a            | 96.7 ± 1.20 a        | 92.3 ± 1.20 ab       | 81.7 ± 2.33 cde      | <b>92.0 ± 2.00 B</b>    | 14.0 ± 0.51 f        | 12.8 ± 0.04 e        | 10.0 ± 0.23 h        | 8.38 ± 0.22 g        | <b>11.3 ± 0.85 I</b>    |
| EC 277134                         | 98.3 ± 0.17 a            | 97.3 ± 0.17 a        | 92.3 ± 0.88 ab       | 91.3 ± 3.33 ab       | <b>94.8 ± 1.18 AB</b>   | 14.6 ± 0.05 ef       | 11.2 ± 0.12 f        | 9.77 ± 0.08 h        | 6.59 ± 0.29 h        | <b>10.5 ± 1.09 J</b>    |
| WH 1105                           | 97.7 ± 1.33 a            | 97.8 ± 0.44 a        | 80.0 ± 2.08 cd       | 75.3 ± 1.33 ef       | <b>87.7 ± 3.13 C</b>    | 16.9 ± 0.07 cd       | 18.8 ± 0.35 bc       | 12.7 ± 0.52 fg       | 7.71 ± 0.31 gh       | <b>14.0 ± 1.62 H</b>    |
| WH 711                            | 98.8 ± 0.17 a            | 98.5 ± 0.29 a        | 93.0 ± 2.65 ab       | 86.3 ± 2.03<br>abcd  | <b>94.2 ± 1.69 AB</b>   | 16.2 ± 0.65 cd       | 17.9 ± 0.07 c        | 15.4 ± 0.27 cd       | 14.0 ± 0.65 cd       | <b>15.9 ± 0.56 E</b>    |
| WH 542                            | 98.3 ± 0.33 a            | 97.0 ± 0.58 a        | 89.0 ± 1.73 ab       | 84.7 ± 2.33 bcd      | <b>92.3 ± 1.82 B</b>    | 15.5 ± 0.12 def      | 17.9 ± 0.06 c        | 13.1 ± 0.31 efg      | 11.6 ± 0.45 ef       | <b>14.5 ± 0.91 G</b>    |
| PBW 725                           | 95.0 ± 2.31 a            | 93.7 ± 1.45 a        | 77.0 ± 1.15 d        | 72.0 ± 2.31 f        | <b>84.4 ± 3.14 D</b>    | 16.7 ± 0.37 cd       | 19.5 ± 0.04 ab       | 15.9 ± 0.09 bc       | 15.3 ± 0.42 bc       | <b>16.9 ± 0.63 C</b>    |
| HD 3086                           | 98.0 ± 0.58 a            | 97.5 ± 0.76 a        | 89.3 ± 1.45 ab       | 88.7 ± 2.40 abc      | <b>93.4 ± 1.47 AB</b>   | 17.3 ± 0.43 bc       | 18.8 ± 0.18 bc       | 15.2 ± 0.03 cd       | 14.1 ± 0.07 cd       | <b>16.4 ± 0.70 D</b>    |
| HD 2967                           | 93.3 ± 1.45 a            | 94.3 ± 2.33 a        | 91.0 ± 1.53 ab       | 90.3 ± 2.03 ab       | <b>92.3 ± 0.94 B</b>    | 19.6 ± 0.61 a        | 20.8 ± 0.21 a        | 18.8 ± 0.34 a        | 17.8 ± 0.34 a        | <b>19.3 ± 0.44 A</b>    |
| DBW 88                            | 95.8 ± 1.01 a            | 95.5 ± 1.26 a        | 85.3 ± 3.33 bc       | 79.3 ± 0.67 def      | <b>89.0 ± 2.26 C</b>    | 18.6 ± 0.24 ab       | 19.6 ± 0.41 ab       | 17.4 ± 0.15 ab       | 16.1 ± 0.19 b        | <b>17.9 ± 0.51 B</b>    |
| <b>Mean (T)</b>                   | <b>97.3 ± 0.35 A</b>     | <b>96.7 ± 0.35 A</b> | <b>88.8 ± 1.01 B</b> | <b>84.7 ± 1.22 C</b> |                         | <b>16.5 ± 0.32 B</b> | <b>17.1 ± 0.59 A</b> | <b>14.1 ± 0.54 C</b> | <b>12.3 ± 0.69 D</b> |                         |

\*The significant differences among temperatures ( $p \leq 0.05$ ) are indicated by different letters

\*\*Uppercase letters showing significant differences among the main factor means (G and T), lowercase letters showing significant differences among interaction means (G×T)

Table S2. Effect of different temperature regimes on shoot length, root length and seedling length of Indian wheat genotypes

| Parameter→                        | Shoot length (cm)   |                     |                     |                     |                         | Root length (cm)    |                     |                     |                     |                         | Seedling length (cm) |                     |                     |                     |                         |
|-----------------------------------|---------------------|---------------------|---------------------|---------------------|-------------------------|---------------------|---------------------|---------------------|---------------------|-------------------------|----------------------|---------------------|---------------------|---------------------|-------------------------|
| Temperature (T)→<br>Genotype (G)↓ | 20°C<br>(Mean ± SE) | 25°C<br>(Mean ± SE) | 30°C<br>(Mean ± SE) | 35°C<br>(Mean ± SE) | Mean (G)<br>(Mean ± SE) | 20°C<br>(Mean ± SE) | 25°C<br>(Mean ± SE) | 30°C<br>(Mean ± SE) | 35°C<br>(Mean ± SE) | Mean (G)<br>(Mean ± SE) | 20°C<br>(Mean ± SE)  | 25°C<br>(Mean ± SE) | 30°C<br>(Mean ± SE) | 35°C<br>(Mean ± SE) | Mean (G)<br>(Mean ± SE) |
| WH 730                            | 9.72 ± 0.17 a       | 14.4 ± 0.08 a       | 14.5 ± 0.09 a       | 14.7 ± 0.10 a       | 13.4 ± 0.63 A           | 16.4 ± 0.27 c       | 20.9 ± 0.30 ef      | 16.6 ± 0.11 a       | 17.2 ± 0.25 de      | 17.8 ± 0.55 C           | 26.1 ± 0.17 bc       | 35.3 ± 0.25 b       | 31.2 ± 0.12 a       | 32.0 ± 0.32 a       | 31.1 ± 1.00 A           |
| WH 1123                           | 7.56 ± 0.09 d       | 9.92 ± 0.16 g       | 9.52 ± 0.17 f       | 9.4 ± 0.10 f        | 9.10 ± 0.28 H           | 12.7 ± 0.16 e       | 19.2 ± 0.28 g       | 14.1 ± 0.08 cd      | 13.2 ± 0.18 f       | 14.8 ± 0.78 G           | 20.3 ± 0.22 e        | 29.1 ± 0.41 e       | 23.6 ± 0.13 e       | 22.6 ± 0.28 g       | 23.9 ± 0.98 I           |
| WH 1021                           | 8.88 ± 0.19 b       | 12.0 ± 0.09 bc      | 12.3 ± 0.09 b       | 12.2 ± 0.12 b       | 11.4 ± 0.44 B           | 18.3 ± 0.22 ab      | 22.7 ± 0.21 bcd     | 15.6 ± 0.12 ab      | 18.1 ± 0.36 bcd     | 18.7 ± 0.77 B           | 27.2 ± 0.32 ab       | 34.7 ± 0.13 b       | 27.9 ± 0.06 b       | 30.3 ± 0.44 b       | 30.0 ± 0.89 B           |
| IC 443661                         | 7.53 ± 0.11 d       | 10.7 ± 0.16 ef      | 11.4 ± 0.23 c       | 9.72 ± 0.17 ef      | 9.84 ± 0.45 E           | 16.4 ± 0.33 c       | 19.2 ± 0.42 g       | 15.0 ± 0.16 bc      | 14.3 ± 0.20 f       | 16.2 ± 0.58 E           | 23.9 ± 0.33 d        | 29.9 ± 0.48 e       | 26.4 ± 0.15 c       | 24.0 ± 0.27 f       | 26.1 ± 0.75 G           |
| EC 277134                         | 8.49 ± 0.20 bc      | 12.5 ± 0.19 b       | 9.95 ± 0.19 ef      | 11.2 ± 0.06 c       | 10.5 ± 0.45 C           | 17.8 ± 0.13 b       | 24.3 ± 0.10 a       | 15.5 ± 0.11 ab      | 18.8 ± 0.11 ab      | 19.1 ± 0.97 A           | 26.3 ± 0.26 bc       | 36.7 ± 0.18 a       | 25.5 ± 0.25 cd      | 30.0 ± 0.05 b       | 29.6 ± 1.35 B           |
| WH 1105                           | 8.04 ± 0.02 cd      | 11.3 ± 0.22 de      | 8.62 ± 0.18 g       | 10.3 ± 0.06 de      | 9.56 ± 0.40 F           | 14.9 ± 0.06 d       | 21.9 ± 0.21 cde     | 14.3 ± 0.18 cd      | 18.1 ± 0.42 bcd     | 17.3 ± 0.91 D           | 22.9 ± 0.06 d        | 33.2 ± 0.41 cd      | 23.0 ± 0.29 e       | 28.4 ± 0.41 cd      | 26.9 ± 1.29 F           |
| WH 711                            | 9.01 ± 0.05 b       | 11.0 ± 0.06 def     | 7.25 ± 0.15 h       | 9.98 ± 0.18 def     | 9.31 ± 0.42 G           | 19.1 ± 0.13 a       | 23.1 ± 0.30 b       | 12.5 ± 0.12 e       | 17.5 ± 0.30 cde     | 18.1 ± 1.16 C           | 28.2 ± 0.08 a        | 34.2 ± 0.32 bc      | 19.7 ± 0.17 f       | 27.4 ± 0.26 de      | 27.4 ± 1.55 E           |
| WH 542                            | 8.50 ± 0.13 bc      | 12.1 ± 0.05 bc      | 10.3 ± 0.15 de      | 11.7 ± 0.07 bc      | 10.7 ± 0.43 C           | 12.2 ± 0.27 e       | 20.7 ± 0.19 f       | 13.8 ± 0.19 d       | 16.6 ± 0.34 e       | 15.8 ± 0.98 F           | 20.7 ± 0.16 e        | 32.8 ± 0.14 d       | 24.2 ± 0.25 de      | 28.3 ± 0.28 cd      | 26.5 ± 1.37 F           |
| PBW 725                           | 7.53 ± 0.24 e       | 11.0 ± 0.07 def     | 7.49 ± 0.04 h       | 9.85 ± 0.19 def     | 8.97 ± 0.46 H           | 13.0 ± 0.18 e       | 21.7 ± 0.21 def     | 12.0 ± 0.26 e       | 16.4 ± 0.06 e       | 15.8 ± 1.15 F           | 20.5 ± 0.38 e        | 32.7 ± 0.26 d       | 19.4 ± 0.25 f       | 26.2 ± 0.20 e       | 24.7 ± 1.59 H           |
| HD 3086                           | 8.64 ± 0.19 d       | 10.6 ± 0.06 f       | 10.2 ± 0.13 de      | 10.3 ± 0.18 de      | 9.93 ± 0.24 E           | 14.5 ± 0.18 d       | 21.6 ± 0.40 def     | 15.5 ± 0.13 b       | 19.7 ± 0.11 a       | 17.8 ± 0.89 C           | 23.1 ± 0.14 d        | 32.2 ± 0.45 d       | 25.7 ± 0.07 c       | 30.0 ± 0.26 b       | 27.7 ± 1.08 DE          |
| HD 2967                           | 6.59 ± 0.02         | 11.5 ± 0.14 cd      | 11.1 ± 0.08 c       | 11.6 ± 0.14 bc      | 10.2 ± 0.63 D           | 19.1 ± 0.38 a       | 22.8 ± 0.28 bc      | 14.7 ± 0.38 bcd     | 16.8 ± 0.24 e       | 18.4 ± 0.92 BC          | 25.7 ± 0.36 c        | 34.3 ± 0.37 bc      | 25.8 ± 0.40 c       | 28.4 ± 0.37 cd      | 28.6 ± 1.07 C           |
| DBW 88                            | 7.53 ± 0.15         | 11.3 ± 0.20 de      | 10.8 ± 0.18 cd      | 10.5 ± 0.10 d       | 10.0 ± 0.45 DE          | 19.3 ± 0.05 a       | 21.7 ± 0.32 cdef    | 12.7 ± 0.15 e       | 18.6 ± 0.16 bc      | 18.1 ± 1.01 C           | 26.8 ± 0.20 abc      | 33.0 ± 0.51 cd      | 23.5 ± 0.28 e       | 29.0 ± 0.16 bc      | 28.1 ± 1.05 D           |
| Mean (T)                          | 8.17 ± 0.14 D       | 11.5 ± 0.19 A       | 10.3 ± 0.33 C       | 11.0 ± 0.24 B       |                         | 16.1 ± 0.43 C       | 21.6 ± 0.25 A       | 14.4 ± 0.24 D       | 17.1 ± 0.31 B       |                         | 24.3 ± 0.46 D        | 33.2 ± 0.36 A       | 24.6 ± 0.53 C       | 28.1 ± 0.44 B       |                         |

\*The significant differences among temperatures ( $p \leq 0.05$ ) are indicated by different letters

\*\*Uppercase letters showing significant differences among the main factor means (G and T), lowercase letters showing significant differences among interaction means (G×T)

Table S3. Effect of different temperature regimes on fresh and dry weight accumulation in seedlings of Indian wheat genotypes

| Parameter→                        | Seedling fresh weight (mg) |                     |                     |                     |                         | Seedling dry weight (mg) |                      |                      |                      |                         | Percent dry weight in seedlings (%) |                      |                      |                      |                         |
|-----------------------------------|----------------------------|---------------------|---------------------|---------------------|-------------------------|--------------------------|----------------------|----------------------|----------------------|-------------------------|-------------------------------------|----------------------|----------------------|----------------------|-------------------------|
| Temperature (T)→<br>Genotype (G)↓ | 20°C<br>(Mean ± SE)        | 25°C<br>(Mean ± SE) | 30°C<br>(Mean ± SE) | 35°C<br>(Mean ± SE) | Mean (G)<br>(Mean ± SE) | 20°C<br>(Mean ± SE)      | 25°C<br>(Mean ± SE)  | 30°C<br>(Mean ± SE)  | 35°C<br>(Mean ± SE)  | Mean (G)<br>(Mean ± SE) | 20°C<br>(Mean ± SE)                 | 25°C<br>(Mean ± SE)  | 30°C<br>(Mean ± SE)  | 35°C<br>(Mean ± SE)  | Mean (G)<br>(Mean ± SE) |
| WH 730                            | 129 ± 1.57 c               | 246 ± 1.70 a        | 205 ± 2.53 a        | 204 ± 1.15 a        | <b>196 ± 12.7 A</b>     | 14.1 ± 0.14 c            | 21.0 ± 0.29 a        | 20.8 ± 0.13 a        | 18.8 ± 0.32 a        | <b>18.7 ± 0.85 B</b>    | 10.9 ± 0.03 a                       | 8.55 ± 0.10 b        | 10.2 ± 0.15 bcd      | 9.19 ± 0.11 abc      | <b>9.71 ± 0.28 AB</b>   |
| WH 1123                           | 123 ± 0.69 cd              | 192 ± 3.10 fg       | 163 ± 2.42 ef       | 170 ± 0.64 e        | <b>162 ± 7.54 E</b>     | 12.8 ± 0.04 d            | 16.4 ± 0.16 bc       | 17.9 ± 0.27 b        | 16.6 ± 0.23 bc       | <b>15.9 ± 0.58 D</b>    | 10.4 ± 0.02 abc                     | 8.54 ± 0.21 b        | 11.0 ± 0.33 a        | 9.76 ± 0.13 ab       | <b>9.91 ± 0.28 A</b>    |
| WH 1021                           | 115 ± 0.73 de              | 202 ± 2.16 de       | 173 ± 2.53 de       | 186 ± 0.12 d        | <b>169 ± 9.92 D</b>     | 12.3 ± 0.28 de           | 15.1 ± 0.24 d        | 18.3 ± 0.46 b        | 16.9 ± 0.22 b        | <b>15.7 ± 0.69 D</b>    | 10.7 ± 0.29 ab                      | 7.44 ± 0.06 cd       | 10.6 ± 0.39 abc      | 9.12 ± 0.12 bc       | <b>9.47 ± 0.42 BC</b>   |
| IC 443661                         | 110 ± 1.91 e               | 183 ± 1.97 g        | 151 ± 2.24 g        | 160 ± 0.70 f        | <b>151 ± 7.98 G</b>     | 11.5 ± 0.16 ef           | 12.9 ± 0.27 ef       | 16.4 ± 0.22 c        | 14.9 ± 0.20 d        | <b>13.9 ± 0.58 G</b>    | 10.4 ± 0.14 abc                     | 7.03 ± 0.15 d        | 10.9 ± 0.15 ab       | 9.35 ± 0.14 abc      | <b>9.42 ± 0.45 BCD</b>  |
| EC 277134                         | 172 ± 2.51 a               | 220 ± 2.25 b        | 188 ± 2.63 bc       | 195 ± 1.65 abc      | <b>194 ± 5.24 A</b>     | 14.2 ± 0.13 c            | 15.4 ± 0.08 cd       | 15.9 ± 0.13 c        | 15.3 ± 0.29 d        | <b>15.2 ± 0.20 E</b>    | 8.26 ± 0.07 f                       | 7.02 ± 0.11 d        | 8.44 ± 0.13 f        | 7.84 ± 0.11 d        | <b>7.89 ± 0.17 F</b>    |
| WH 1105                           | 153 ± 0.77 b               | 171 ± 1.91 h        | 159 ± 0.53 fg       | 161 ± 1.92 ef       | <b>161 ± 2.06 F</b>     | 11.2 ± 0.17 f            | 12.4 ± 0.33 f        | 14.5 ± 0.25 d        | 12.4 ± 0.06 f        | <b>12.6 ± 0.37 H</b>    | 7.32 ± 0.09 g                       | 7.24 ± 0.23 cd       | 9.12 ± 0.13 ef       | 7.67 ± 0.09 d        | <b>7.84 ± 0.24 F</b>    |
| WH 711                            | 165 ± 3.79 a               | 208 ± 1.07 cd       | 178 ± 1.24 d        | 190 ± 1.85 bcd      | <b>185 ± 4.94 B</b>     | 14.6 ± 0.14 bc           | 17.3 ± 0.11 b        | 13.5 ± 0.22 de       | 13.9 ± 0.46 e        | <b>14.8 ± 0.46 F</b>    | 8.88 ± 0.25 ef                      | 8.28 ± 0.03 b        | 7.56 ± 0.10 g        | 7.29 ± 0.24 de       | <b>8.01 ± 0.20 F</b>    |
| WH 542                            | 121 ± 1.14 cd              | 145 ± 2.80 i        | 133 ± 2.37 h        | 142 ± 1.06 g        | <b>135 ± 2.93 H</b>     | 10.1 ± 0.17 g            | 13.6 ± 0.23 e        | 13.1 ± 0.04 e        | 12.4 ± 0.11 f        | <b>12.3 ± 0.41 I</b>    | 8.32 ± 0.06 f                       | 9.40 ± 0.30 a        | 9.82 ± 0.20 de       | 8.71 ± 0.06 c        | <b>9.06 ± 0.19 DE</b>   |
| PBW 725                           | 123 ± 0.73 cd              | 198 ± 1.23 ef       | 179 ± 0.99 cd       | 187 ± 2.72 cd       | <b>172 ± 8.82 C</b>     | 12.1 ± 0.05 def          | 16.6 ± 0.05 b        | 13.5 ± 0.16 de       | 12.4 ± 0.03 f        | <b>13.6 ± 0.54 G</b>    | 9.81 ± 0.09 cd                      | 8.37 ± 0.08 b        | 7.56 ± 0.11 g        | 6.62 ± 0.09 e        | <b>8.09 ± 0.36 F</b>    |
| HD 3086                           | 118 ± 1.43 de              | 190 ± 1.10 fg       | 165 ± 0.59 ef       | 182 ± 2.24 d        | <b>164 ± 8.44 E</b>     | 11.8 ± 0.16 ef           | 15.1 ± 0.15 d        | 16.5 ± 0.33 c        | 15.7 ± 0.11 cd       | <b>14.8 ± 0.55 F</b>    | 10.0 ± 0.16 bcd                     | 7.93 ± 0.05 bc       | 10.0 ± 0.17 cd       | 8.64 ± 0.12 c        | <b>9.14 ± 0.27 CDE</b>  |
| HD 2967                           | 168 ± 2.79 a               | 216 ± 2.57 bc       | 193 ± 2.55 b        | 198 ± 2.67 ab       | <b>194 ± 5.28 A</b>     | 15.8 ± 0.09 a            | 21.4 ± 0.22 a        | 20.8 ± 0.24 a        | 19.7 ± 0.16 a        | <b>19.4 ± 0.66 A</b>    | 9.43 ± 0.11 de                      | 9.94 ± 0.14 a        | 10.8 ± 0.15 ab       | 9.91 ± 0.05 a        | <b>10.0 ± 0.15 A</b>    |
| DBW 88                            | 165 ± 1.23 a               | 223 ± 2.47 b        | 193 ± 2.69 b        | 200 ± 2.13 a        | <b>195 ± 6.32 A</b>     | 15.5 ± 0.20 ab           | 21.3 ± 0.17 a        | 16.4 ± 0.26 c        | 15.3 ± 0.09 d        | <b>17.1 ± 0.74 C</b>    | 9.42 ± 0.19 de                      | 9.53 ± 0.14 a        | 8.49 ± 0.11 f        | 7.64 ± 0.12 d        | <b>8.77 ± 0.24 E</b>    |
| Mean (T)                          | <b>138 ± 3.88 D</b>        | <b>199 ± 4.30 A</b> | <b>177 ± 3.33 C</b> | <b>181 ± 3.11 B</b> |                         | <b>13.0 ± 0.30 C</b>     | <b>16.5 ± 0.52 A</b> | <b>16.5 ± 0.43 A</b> | <b>15.3 ± 0.39 B</b> |                         | <b>9.49 ± 0.18 A</b>                | <b>8.27 ± 0.16 C</b> | <b>9.53 ± 0.21 A</b> | <b>8.48 ± 0.17 B</b> |                         |

\*The significant differences among temperatures ( $p \leq 0.05$ ) are indicated by different letters

\*\*Uppercase letters showing significant differences among the main factor means (G and T), lowercase letters showing significant differences among interaction means (G×T)

**Table S4. Effect of different temperature regimes on seedling vigour index-I and seedling vigour index-II of Indian wheat genotypes**

| Parameter→                        | Seedling vigour index-I |                     |                     |                     |                         | Seedling vigour index-II |                     |                     |                     |                         |
|-----------------------------------|-------------------------|---------------------|---------------------|---------------------|-------------------------|--------------------------|---------------------|---------------------|---------------------|-------------------------|
| Temperature (T)→<br>Genotype (G)↓ | 20°C<br>(Mean ± SE)     | 25°C<br>(Mean ± SE) | 30°C<br>(Mean ± SE) | 35°C<br>(Mean ± SE) | Mean (G)<br>(Mean ± SE) | 20°C<br>(Mean ± SE)      | 25°C<br>(Mean ± SE) | 30°C<br>(Mean ± SE) | 35°C<br>(Mean ± SE) | Mean (G)<br>(Mean ± SE) |
| WH 730                            | 2538 ± 32 bcd           | 3439 ± 40 ab        | 2920 ± 75 a         | 2971 ± 40 a         | <b>2967 ± 98.7 A</b>    | 1372 ± 28 abc            | 2047 ± 12 a         | 1951 ± 51 a         | 1744 ± 43 a         | <b>1779 ± 80 A</b>      |
| WH 1123                           | 1994 ± 18 g             | 2844 ± 66 e         | 2223 ± 43 bcd       | 2087 ± 36 ghi       | <b>2287 ± 102 G</b>     | 1258 ± 7 bcd             | 1602 ± 2 bc         | 1687 ± 36 b         | 1529 ± 45 b         | <b>1519 ± 50 B</b>      |
| WH 1021                           | 2677 ± 24 ab            | 3353 ± 24 abc       | 2454 ± 63 b         | 2468 ± 89 cde       | <b>2738 ± 113 C</b>     | 1216 ± 24 cde            | 1455 ± 29 cd        | 1611 ± 57 bc        | 1376 ± 32bc         | <b>1415 ± 46 CD</b>     |
| IC 443661                         | 2333 ± 14 de            | 2892 ± 50 e         | 2438 ± 43 b         | 1959 ± 78 hi        | <b>2405 ± 103 F</b>     | 1118 ± 18 def            | 1245 ± 21 e         | 1517 ± 3 cd         | 1222 ± 51 cd        | <b>1275 ± 46 E</b>      |
| EC 277134                         | 2584 ± 28 abc           | 3579 ± 11 a         | 2352 ± 42 bc        | 2743 ± 96 ab        | <b>2815 ± 141 B</b>     | 1400 ± 12 ab             | 1502 ± 6 c          | 1466 ± 25 cd        | 1398 ± 74 b         | <b>1441 ± 22 C</b>      |
| WH 1105                           | 2236 ± 29 ef            | 3243 ± 44 bcd       | 1835 ± 29 e         | 2139 ± 7 fgh        | <b>2363 ± 160 F</b>     | 1091 ± 11 ef             | 1208 ± 27 e         | 1159 ± 42 fg        | 934 ± 17 f          | <b>1098 ± 33 G</b>      |
| WH 711                            | 2783 ± 10 a             | 3364 ± 37 abc       | 1831 ± 37 e         | 2369 ± 69 def       | <b>2587 ± 170 D</b>     | 1445 ± 12 a              | 1700 ± 13 b         | 1255 ± 54 ef        | 1196 ± 19 de        | <b>1399 ± 61 CD</b>     |
| WH 542                            | 2032 ± 13 fg            | 3182 ± 6 cd         | 2150 ± 46 cd        | 2394 ± 61 de        | <b>2440 ± 136 EF</b>    | 989 ± 16 f               | 1319 ± 28 de        | 1164 ± 20 fg        | 1048 ± 38 ef        | <b>1130 ± 40 FG</b>     |
| PBW 725                           | 1953 ± 82 g             | 3062 ± 31 de        | 1495 ± 21 f         | 1887 ± 73 i         | <b>2099 ± 177 H</b>     | 1144 ± 24 def            | 1556 ± 23 bc        | 1041 ± 14 g         | 892 ± 27 f          | <b>1158 ± 75 F</b>      |
| HD 3086                           | 2266 ± 10 ef            | 3139 ± 68 cd        | 2294 ± 31 bc        | 2657 ± 69 bc        | <b>2589 ± 109 D</b>     | 1153 ± 21 de             | 1469 ± 6 cd         | 1472 ± 40 cd        | 1393 ± 33 b         | <b>1372 ± 41 D</b>      |
| HD 2967                           | 2402± 71 cde            | 3236 ± 68 bcd       | 2344 ± 74 bc        | 2567 ± 47 bcd       | <b>2638 ± 111 D</b>     | 1478 ± 30 a              | 2021 ± 50 a         | 1893 ± 27 a         | 1776 ± 36 a         | <b>1792 ± 63 A</b>      |
| DBW 88                            | 2570 ± 14 abcd          | 3150 ± 14 cd        | 2007 ± 90 de        | 2303 ± 31 efg       | <b>2507 ± 129 E</b>     | 1488 ± 23 a              | 2030 ± 38 a         | 1400 ± 78 de        | 1208 ± 14 d         | <b>1532 ± 94 B</b>      |
| <b>Mean (T)</b>                   | <b>2364± 46 B</b>       | <b>3207 ± 36 A</b>  | <b>2195 ± 61 C</b>  | <b>2379 ± 55 B</b>  |                         | <b>1263 ± 28 D</b>       | <b>1596 ± 49 A</b>  | <b>1468 ± 48 B</b>  | <b>1310 ± 47 C</b>  |                         |

\*The significant differences among temperatures ( $p \leq 0.05$ ) are indicated by different letters

\*\*Uppercase letters showing significant differences among the main factor means (G and T), lowercase letters showing significant differences among interaction means (G×T)

Table S5. Effect of different temperature regimes on the activity of different antioxidant enzymes in seedlings of Indian wheat genotypes

| Parameter→                        | Catalase activity (Units min <sup>-1</sup> g <sup>-1</sup> fresh weight) |                        |                        |                        |                         | Peroxidase activity (Units min <sup>-1</sup> g <sup>-1</sup> fresh weight) |                       |                       |                       |                         | Superoxide dismutase activity (Units min <sup>-1</sup> g <sup>-1</sup> fresh weight) |                       |                       |                       |                         |
|-----------------------------------|--------------------------------------------------------------------------|------------------------|------------------------|------------------------|-------------------------|----------------------------------------------------------------------------|-----------------------|-----------------------|-----------------------|-------------------------|--------------------------------------------------------------------------------------|-----------------------|-----------------------|-----------------------|-------------------------|
| Temperature (T)→<br>Genotype (G)↓ | 20°C<br>(Mean ± SE)                                                      | 25°C<br>(Mean ± SE)    | 30°C<br>(Mean ± SE)    | 35°C<br>(Mean ± SE)    | Mean (G)<br>(Mean ± SE) | 20°C<br>(Mean ± SE)                                                        | 25°C<br>(Mean ± SE)   | 30°C<br>(Mean ± SE)   | 35°C<br>(Mean ± SE)   | Mean (G)<br>(Mean ± SE) | 20°C<br>(Mean ± SE)                                                                  | 25°C<br>(Mean ± SE)   | 30°C<br>(Mean ± SE)   | 35°C<br>(Mean ± SE)   | Mean (G)<br>(Mean ± SE) |
| WH 730                            | 0.545 ± 0.006 c                                                          | 0.625 ± 0.003 b        | 0.510 ± 0.011 bc       | 0.863 ± 0.014 ef       | <b>0.636 ± 0.042 B</b>  | 48.44 ± 0.15 fg                                                            | 54.07 ± 0.32 cde      | 59.79 ± 0.36 b        | 49.90 ± 0.22 a        | <b>53.05 ± 1.33 C</b>   | 11.30 ± 0.26 f                                                                       | 27.17 ± 0.13 g        | 42.49 ± 0.15 fg       | 23.49 ± 0.25 e        | <b>26.11 ± 3.36 I</b>   |
| WH 1123                           | 0.507 ± 0.008 d                                                          | 0.607 ± 0.007 b        | 0.464 ± 0.009 de       | 0.857 ± 0.008 f        | <b>0.608 ± 0.046 D</b>  | 47.69 ± 0.60 g                                                             | 55.53 ± 0.68 bcd      | 58.75 ± 0.41 b        | 43.69 ± 0.28 cde      | <b>51.41 ± 1.82 E</b>   | 11.28 ± 0.05 f                                                                       | 52.46 ± 0.55 b        | 60.42 ± 0.56 c        | 29.86 ± 0.70 d        | <b>38.51 ± 5.83 CD</b>  |
| WH 1021                           | 0.213 ± 0.002 f                                                          | 0.286 ± 0.001 f        | 0.432 ± 0.001 ef       | 0.912 ± 0.009 bcd      | <b>0.461 ± 0.082 G</b>  | 54.01 ± 0.03 ab                                                            | 56.93 ± 0.24 b        | 59.02 ± 0.15 b        | 46.22 ± 0.62 b        | <b>54.04 ± 1.47 B</b>   | 30.53 ± 0.40 c                                                                       | 56.32 ± 0.93 a        | 49.48 ± 0.53 e        | 17.00 ± 0.08 g        | <b>38.33 ± 4.69 D</b>   |
| IC 443661                         | 0.207 ± 0.001 f                                                          | 0.304 ± 0.004 ef       | 0.541 ± 0.011 b        | 0.893 ± 0.005 cde      | <b>0.486 ± 0.080 F</b>  | 54.54 ± 0.26 ab                                                            | 60.47 ± 0.26 a        | 67.64 ± 0.20 a        | 50.28 ± 0.21 a        | <b>58.23 ± 1.97 A</b>   | 33.07 ± 0.37 ab                                                                      | 39.11 ± 0.48 d        | 55.80 ± 0.77 d        | 36.05 ± 0.48 c        | <b>41.01 ± 2.66 B</b>   |
| EC 277134                         | 0.636 ± 0.008 ab                                                         | 0.723 ± 0.002 a        | 0.407 ± 0.004 f        | 0.974 ± 0.018 a        | <b>0.685 ± 0.061 A</b>  | 44.14 ± 0.08 h                                                             | 53.28 ± 0.53 e        | 55.60 ± 0.28 cd       | 45.78 ± 0.20 bc       | <b>49.70 ± 1.47 F</b>   | 34.08 ± 0.45 a                                                                       | 42.11 ± 0.39 c        | 69.56 ± 0.90 a        | 15.93 ± 0.22 g        | <b>40.42 ± 5.83 B</b>   |
| WH 1105                           | 0.494 ± 0.003 d                                                          | 0.503 ± 0.004 c        | 0.429 ± 0.009 ef       | 0.798 ± 0.002 g        | <b>0.556 ± 0.043 E</b>  | 52.75 ± 0.40 bc                                                            | 56.88 ± 0.49 b        | 56.31 ± 0.43 c        | 42.08 ± 0.38 ef       | <b>52.00 ± 1.80 DE</b>  | 19.60 ± 0.15 e                                                                       | 42.86 ± 0.54 c        | 35.25 ± 0.45 h        | 35.60 ± 0.24 c        | <b>33.33 ± 2.56 G</b>   |
| WH 711                            | 0.297 ± 0.002 e                                                          | 0.314 ± 0.005 ef       | 0.496 ± 0.002 cd       | 0.879 ± 0.012 def      | <b>0.496 ± 0.071 F</b>  | 53.23 ± 0.42 b                                                             | 55.99 ± 0.45 bc       | 53.96 ± 0.87 de       | 44.49 ± 0.17 bcd      | <b>51.92 ± 1.35 DE</b>  | 11.59 ± 0.06 f                                                                       | 38.45 ± 0.46 d        | 40.97 ± 0.28 g        | 20.40 ± 0.18 f        | <b>27.85 ± 3.71 H</b>   |
| WH 542                            | 0.483 ± 0.006 d                                                          | 0.530 ± 0.009 c        | 0.529 ± 0.004 bc       | 0.942 ± 0.012 ab       | <b>0.621 ± 0.056 C</b>  | 50.58 ± 0.14 de                                                            | 53.69 ± 0.44 de       | 49.83 ± 0.41 f        | 40.45 ± 0.26 f        | <b>48.64 ± 1.50 G</b>   | 17.47 ± 0.00 e                                                                       | 33.61 ± 0.40 e        | 69.32 ± 1.34 a        | 36.07 ± 0.46 c        | <b>39.11 ± 5.69 C</b>   |
| PBW 725                           | 0.644 ± 0.008 a                                                          | 0.421 ± 0.002 d        | 0.729 ± 0.010 a        | 0.937 ± 0.006 b        | <b>0.683 ± 0.056 A</b>  | 51.13 ± 0.48 cd                                                            | 53.93 ± 0.61 cde      | 44.89 ± 0.48 g        | 36.29 ± 0.27 gh       | <b>46.56 ± 2.05 I</b>   | 18.95 ± 0.06 e                                                                       | 29.02 ± 0.34 fg       | 62.65 ± 0.52 c        | 31.36 ± 0.25 d        | <b>35.49 ± 4.93 F</b>   |
| HD 3086                           | 0.547 ± 0.011 c                                                          | 0.334 ± 0.001 e        | 0.711 ± 0.009 a        | 0.923 ± 0.013 bc       | <b>0.629 ± 0.065 C</b>  | 48.62 ± 0.73 efg                                                           | 50.79 ± 0.78 f        | 45.09 ± 0.27 g        | 35.06 ± 0.33 h        | <b>44.89 ± 1.83 J</b>   | 31.22 ± 0.46 bc                                                                      | 38.23 ± 0.64 d        | 53.63 ± 1.16 d        | 13.35 ± 0.03 h        | <b>34.11 ± 4.37 F</b>   |
| HD 2967                           | 0.607 ± 0.006 b                                                          | 0.598 ± 0.011 b        | 0.462 ± 0.003 de       | 0.907 ± 0.006 bcd      | <b>0.643 ± 0.049 B</b>  | 55.79 ± 0.68 a                                                             | 57.41 ± 0.34 b        | 52.63 ± 0.74 e        | 43.39 ± 0.28 de       | <b>52.31 ± 1.65 D</b>   | 34.55 ± 0.29 a                                                                       | 41.85 ± 0.94 c        | 65.81 ± 0.52 b        | 55.27 ± 0.59 a        | <b>49.37 ± 3.64 A</b>   |
| DBW 88                            | 0.508 ± 0.005 d                                                          | 0.536 ± 0.006 c        | 0.420 ± 0.002 f        | 0.741 ± 0.006 h        | <b>0.551 ± 0.035 E</b>  | 50.40 ± 0.90 def                                                           | 54.01 ± 0.30 cde      | 49.29 ± 0.30 f        | 37.65 ± 0.43 g        | <b>47.84 ± 1.86 H</b>   | 26.02 ± 0.23 d                                                                       | 30.76 ± 0.26 f        | 44.35 ± 0.45 f        | 48.36 ± 0.71 b        | <b>37.37 ± 2.79 E</b>   |
| Mean (T)                          | <b>0.474 ± 0.025 C</b>                                                   | <b>0.482 ± 0.024 C</b> | <b>0.511 ± 0.017 B</b> | <b>0.885 ± 0.011 A</b> |                         | <b>50.94 ± 0.55 C</b>                                                      | <b>55.25 ± 0.42 A</b> | <b>54.40 ± 1.07 B</b> | <b>42.94 ± 0.80 D</b> |                         | <b>23.30 ± 1.51 D</b>                                                                | <b>39.33 ± 1.43 B</b> | <b>54.14 ± 1.90 A</b> | <b>30.23 ± 2.11 C</b> |                         |

\*The significant differences among temperatures ( $p \leq 0.05$ ) are indicated by different letters

\*\*Uppercase letters showing significant differences among the main factor means (G and T), lowercase letters showing significant differences among interaction means (G×T)

**Table S6. PC loadings for seed germination, seedling growth and biochemical parameters of wheat genotypes**

| <b>Parameters</b>              | <b>PC1</b>   | <b>PC2</b>   | <b>PC3</b>   |
|--------------------------------|--------------|--------------|--------------|
| <b>Eigen value</b>             | <b>5.02</b>  | <b>2.62</b>  | <b>1.91</b>  |
| <b>% Variation</b>             | <b>38.59</b> | <b>20.16</b> | <b>14.70</b> |
| <b>% Cumulative variation</b>  | <b>38.59</b> | <b>58.75</b> | <b>73.45</b> |
| Standard germination           | -0.169       | -0.445       | -0.220       |
| Speed of germination           | -0.124       | -0.277       | -0.154       |
| Shoot length                   | -0.328       | 0.224        | 0.140        |
| Root length                    | -0.354       | 0.068        | -0.364       |
| Seedling length                | -0.400       | 0.145        | -0.208       |
| Seedling fresh weight          | -0.336       | 0.285        | 0.092        |
| Seedling dry weight            | -0.332       | 0.057        | 0.432        |
| Percent dry weight in seedling | 0.009        | -0.323       | 0.433        |
| Seedling vigour index-I        | -0.406       | -0.044       | -0.257       |
| Seedling vigour index-II       | -0.368       | -0.090       | 0.320        |
| Catalase activity              | 0.067        | 0.519        | 0.104        |
| Peroxidase activity            | -0.177       | -0.424       | 0.113        |
| Superoxide dismutase activity  | -0.063       | -0.041       | 0.398        |

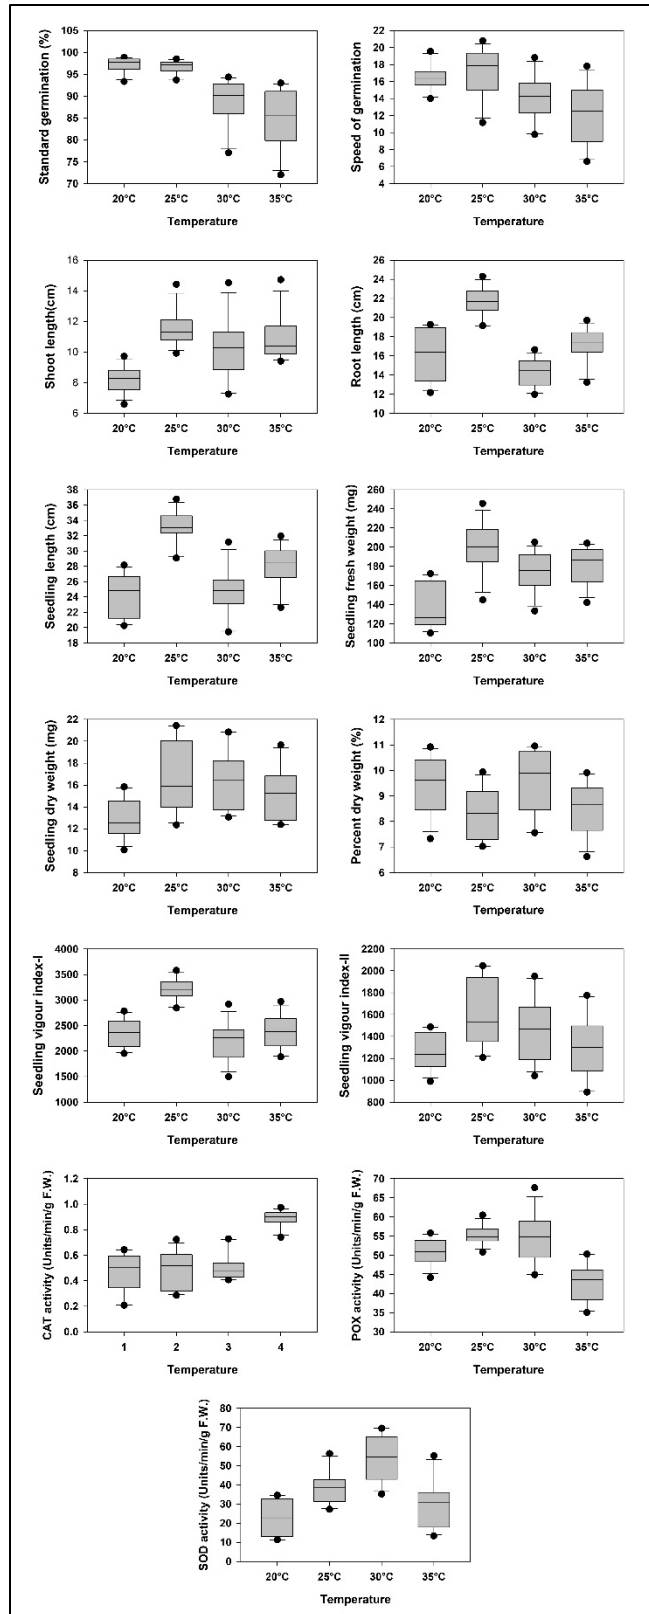

Figure S1. Boxplot distribution of germination characteristics and biochemical parameters at four temperature regimes
